# Supplementary material for: Overexpression of a microRNA-targeted NAC transcription factor improves drought and salt tolerance in Rice via ABA-mediated pathways
Source: PubMed Central journal article supplement (PMC6803609; doi:10.1186/s12284-019-0334-6), 2019-10-21

S Fig. 1

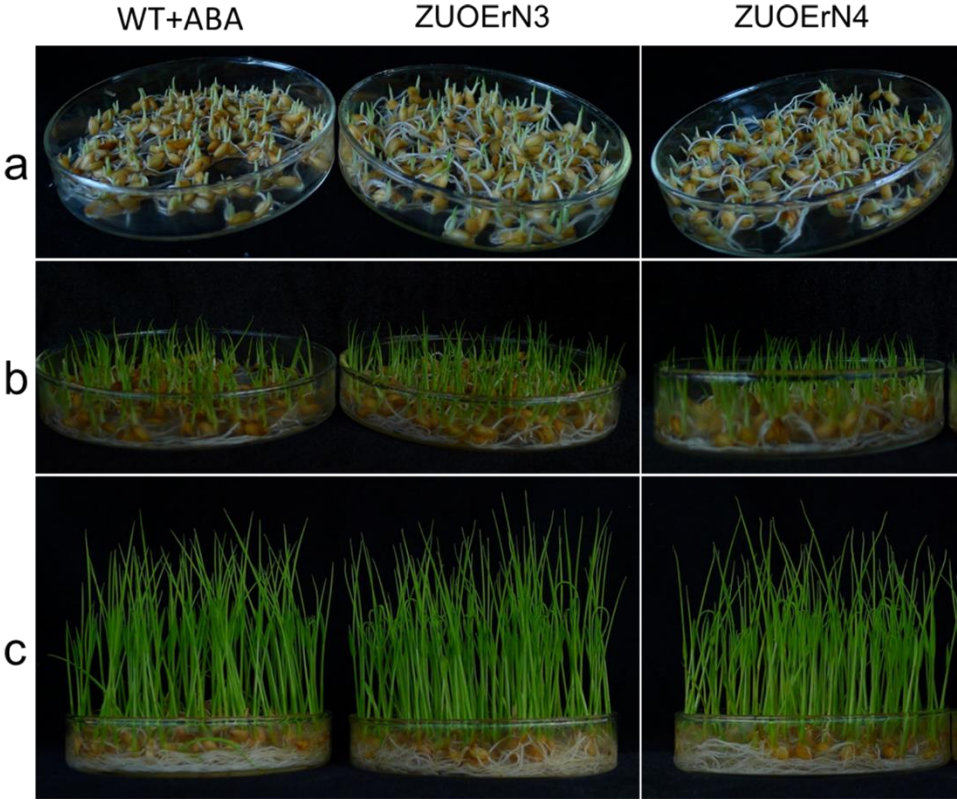

S Fig. 2

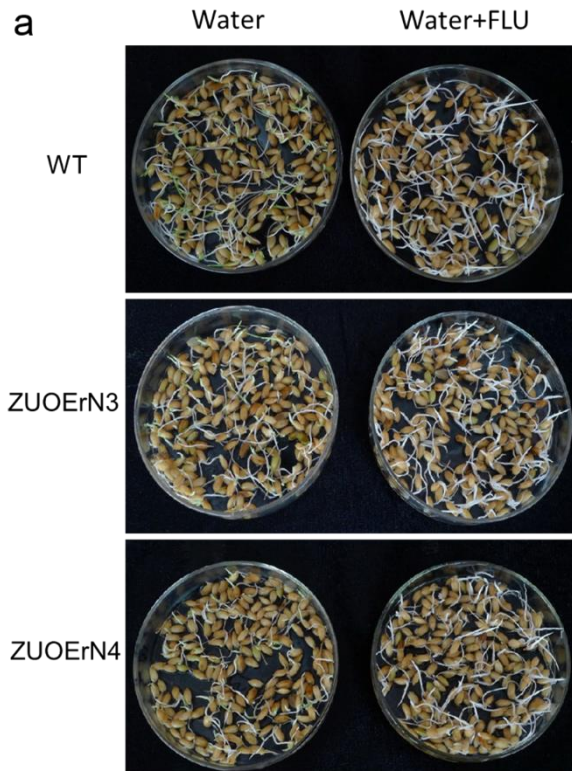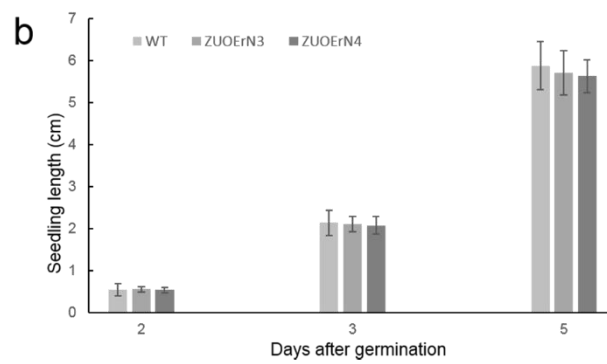

S Fig. 3

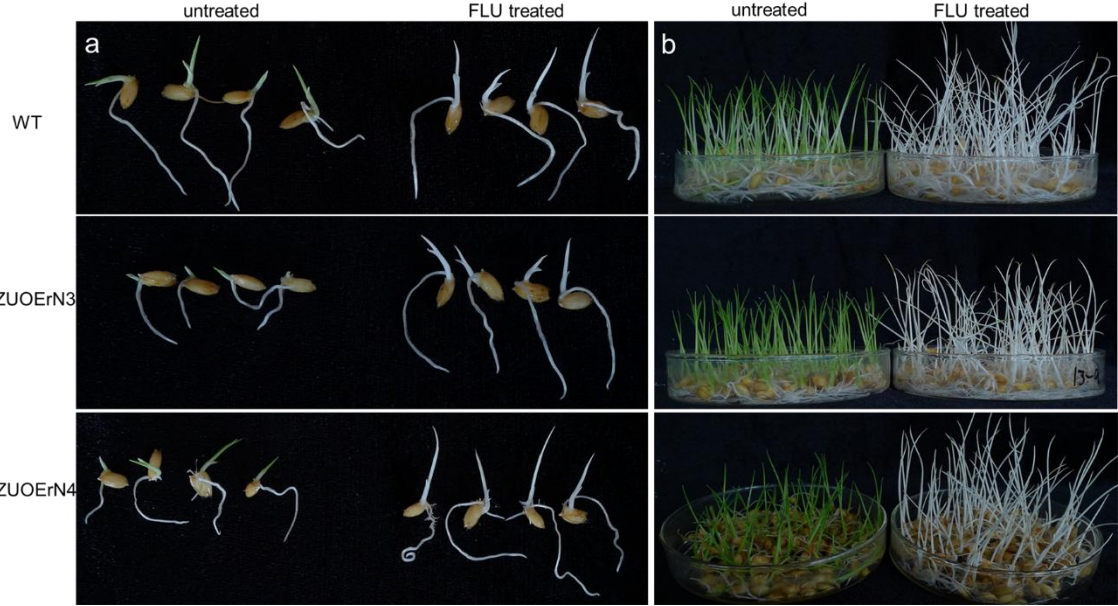

S Fig. 4

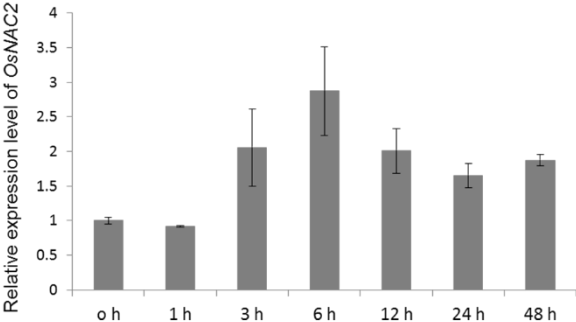

Supplement: 12284_2019_334_MOESM1_ESM.pdf [file 12284_2019_334_MOESM1_ESM.pdf]
